# Supplementary material for: The synthesis, structure and ethene polymerisation catalysis of mono(salicylaldiminato) titanium and zirconium complexes
Source: Royal Society of Chemistry journal article supplement (doi:10.1039/b414229b), 2005-01-01
Supplement: b414229b.doc [file b414229b.doc]

Manuscript: B414229B

**The synthesis, structure and ethene polymerisation catalysis of mono(salicylaldiminato) titanium and zirconium complexes**

Dale A. Pennington,William Clegg, Simon J. Coles, Ross W. Harrington, Michael B. Hursthouse, David L. Hughes, Mark E. Light, Mark Schormann, Manfred Bochmann and Simon J. Lancaster*

Electronic supplementary information.

Ligand syntheses

3-But-2-(OSiMe3)C6H3CH=N(2,6-Pri2C6H3) (**2b**)

Following a similar procedure to that for **2a**, 1b (7.2 g, 25 mmol) was deprotonated with *n-*BuLi (15.6 cm3 of a 1.6 M hexane solution, 25 mmol) and treated with excess SiClMe3 (20 cm3). The volatiles were removed under reduced pressure and the resulting product crystallised from ethanol (50 cm3) at 20 °C to give yellow blocks (9.8 g, 24 mmol, 95%). 1H NMR (293 MHz, 293 K, CDCl3): δ 8.55 (s, 1H, CH=N), 8.13 (dd, 1H, J = 5.9, 1.8 Hz, Ar-H), 7.52 (dd, 1H, J = 5.9, 1.8 Hz, Ar-H), 7.19-7.09 (m, 4H, Ar-H), 3.03 (m, 2H, J = 6.9 Hz, CH(CH3)2), 1.47 (s, 9H, But), 1.19 (d, 6H, J = 6.9 Hz, CH(CH3)2), 0.28 (s, 9H, Si(CH3)3). 13C NMR (75.5 MHz, 293 K, CDCl3): δ 159.8 (C-O), 155.5 (C=N), 137.9, 131.0, 128.4, 126.4, 124.3, 123.3, 122.0 (Ar), 35.3 (C(CH3)3), 30.8 (CH3), 28.2 (CH(CH3)2), 23.9 (CH(CH3)2), 2.2 (Si(CH3)3).

3-But-2-(OSiMe3)C6H3CH=N(2,4,6-Me3C6H2) (**2c**)

Following a similar procedure to that for **2a, 1c** (9.20 g, 30 mmol) was deprotonated with *n*-BuLi (18.8 cm3 of a 1.6 M hexane solution, 30 mmol) and treated with excess SiClMe3 (20 cm3). The volatiles were removed under reduced pressure and the resulting product crystallised from ethanol (50 cm3) at 20°C to give orange blocks (8.2 g, 27 mmol, 89%). 1H NMR (300 MHz, 293 K, CDCl3): δ 8.50 (s, 1H, CH=N), 7.99 (d, 1H, J = 7.5 Hz, Ar-H), 7.47 (d, 1H, J = 7.5 Hz, Ar-H), 7.05 (t, 1H, J = 7.6 Hz, Ar-H), 6.87 (s, 2H, Ar-H), 2.29 (s, 3H, *p*-Me), 2.12 (s, 6H, *o*-Me), 1.43 (s, 9H, But), 0.24 (s, 9H, Si(CH3)3). 13C NMR (75.5 MHz, 293 K, CDCl3): δ 161.6 (C-O), 155.5 (C=N), 149.3, 141.6, 133.1, 130.9, 129.2, 128.9, 127.3, 126.4, 122.0 (Ar), 35.3 (*C*(CH3)3), 30.8 (C(*C*H3)3), 21.2 (*p-*CH3), 18.8 (*o*-CH3), 2.1 (Si(CH3)3). Anal. Found: C, 75.36; H, 8.93; N, 3.74. Calc. for :C23H33N: C, 75.15; H, 9.05; N 3.81.

3-But-2-(OSiMe3)C6H3CH=N(2-C6H5C6H4) (**2d**)

Following a similar procedure to that for **2a, 1d** (13.4 g, 41 mmol) was deprotonated with *n*-BuLi (25.6 cm3 of a 1.6 M hexane solution, 41 mmol) and treated with excess SiClMe3 (20 cm3). The volatiles were removed under reduced pressure and the resulting product crystallised from ethanol (50 cm3) at 20°C to give yellow blocks (13.3 g, 36.9 mmol, 90%). 1H NMR (300 MHz, 293 K, CDCl3): δ 8.78 (s, 1H, CH=N), 7.80-6.55 (m, 11H, Ar), 1.47 (s, 9H, But), 0.32 (s, 9H, Si(CH3)3). 13C NMR (75.5 MHz, 293 K, CDCl3): δ 158.8 (C-O), 155.7 (C=N), 150.8, 144.6 (Ar), 140.1, 135.0, 130.8, 130.6, 130.4, 129.9, 129.3, 128.9, 128.7, 128.1, 127.7, 127.2, 127.0, 126.1, 122.1, 122.0, 119.5, 116.9, 112.1 (Ar), 35.3 (*C*(CH3)3), 30.9 (C(*C*H3)3), 2.3 (Si(CH3)3).

3-But-2-(OSiMe3)C6H3CH=N(C6F5) (**2e**)

Following a similar procedure to that for **2a, 1e** (14.8 g, 43 mmol) was deprotonated with *n-*BuLi (26.9 cm3 of a 1.6 M hexane solution, 43 mmol) and treated with excess SiClMe3 (20 cm3). The volatiles were removed under reduced pressure and the resulting product crystallised from light petroleum (40 cm3) at –30°C to give bright yellow needle-shaped crystals (17 g, 41 mmol, 95%). 1H NMR (300 MHz, 293 K, CDCl3): δ 8.85 (s, 1H, CH=N), 7.97 (dd, 1H, J = 7.7, 1.8 Hz, Ar-H), 7.55 (dd, 1H, J = 7.7, 1.8 Hz, Ar-H), 7.05 (t, 1H, J = 7.7 Hz, Ar-H), 1.43 (s, 9H, But), 0.28 (s, 9H, Si(CH3)3). 13C NMR (75.5 MHz, 293 K, CDCl3): δ 167.6 (C-O), 156.6 (C=N), 141.9, 140.0, 136.6, 132.7, 128.0, 127.8, 126.7, 122.3 (Ar), 35.3 (*C*(CH3)3), 30.8 (C(*C*H3)3), 2.1 (Si(CH3)3). 19F (282.4 MHz, 293 K, CDCl3): δ –149.7 (s, 2F, *o*-F), -157.2 (s, 1F, *p*-F), ‑159.2 (s, 2F, *m*-F). Anal. Found: C, 58.20 ; H, 5.43; N, 3.40. Calc. for C20H22N: C, 57.82; H, 5.34; N, 3.37.

3-But-2-(OSiMe3)C6H3CH=O (**2f**)

Following a similar procedure to that for **2a,** 3-But-2-(OH)C6H3CH=O (4.1 g, 15 mmol) was deprotonated with *n-*BuLi (9.4 cm3 of a 1.6 M hexane solution, 15 mmol) and treated with excess SiClMe3 (10 cm3). The volatiles were removed under reduced pressure and the resulting product crystallised from light petroleum (40 cm3) at –30°C to give yellow plate-like crystals (3.2 g, 13 mmol, 85%). 1H NMR (293 MHz, 293 K, CDCl3): δ 8.77 (s, 1H, CH=N), 8.57 (d, 1H, J = 6.9 Hz, Ar-H), 7.67-6.96 (m, 7H, Ar-H), 3.41 (s, 2H, N-CH2), 1.41 (s, 9H, C(CH3)3), 0.32 (s, 9H, Si(CH3)). 13C NMR (75.5 MHz, 293 K, CDCl3): δ 191.5 (C=O), 158.1 (C-O), 142.3, 134.2, 129.4, 127.2, 121.9 (Ar), 35.3 (*C*(CH3)3), 30.8 (C(*C*H3)3), 2.1 (Si(CH3)).

Complex syntheses

[Ti{3-But-2-(O)C6H3CH=N(2,6-Pri2C6H3)}Cl(µ-Cl3)TiCl3] (**3b**)

TiCl4 (1.54 cm3, 14 mmol) was treated with **2b** (2.79 g, 7 mmol) following a similar procedure to that for **3a**. The volatiles were removed under reduced pressure and the resulting red solid was washed with light petroleum (2 x 40 cm3). The crude product was recrystallised from toluene at -30 °C, affording dark red blocks (suitable for X-ray diffraction) (4.24 g, 6.23 mmol, 89%). 1H NMR (300 MHz, 293 K, CDCl3): δ 8.54 (s, 1H, CH=N), 7.89-7.24 (m, 6H, Ar-H), 2.80 (m, 2H, C*H*(CH3)2), 1.65 (s, 9H, C(CH3)3), 1.36-1.34 (d, 6H, J = 6.7 Hz, CH(C*H*3)2), 1.09-1.11 (d, 6H, J = 6.8 Hz, CH(C*H*3)2). 13C NMR (75.5 MHz, 293 K, CDCl3): δ 170.9 (C-O), 167.0 (C=N), 140.6 (Ar), 139.2 (Ar), 136.6 (Ar), 133.6 (Ar), 128.7 (Ar), 124.7 (Ar), 124.4 (Ar), 124.1 (Ar), 35.7 (*C*(CH3)3), 30.4 (C(*C*H3)3), 29.6 (*C*H(CH3)2), 25.5 (CH(*C*H3)2), 23.1 (CH(*C*H3)2). Anal. Found: C, 40.36; H, 4.33; N, 1.82; Cl, 37.33. Calc. for C23H30NOCl7Ti2: C, 40.60; H, 4.44; N, 2.06; Cl, 36.47.

[Ti{3-But-2-(O)C6H3CH=N(2,4,6-Me3C6H2)}Cl(µ-Cl3)TiCl3] (**3c**)

TiCl4 (1.10 cm3, 10 mmol) was treated with **2c** (1.84 g, 5 mmol) following a similar procedure to that for **3a**. The volatiles were removed under reduced pressure and the resulting red solid was washed with light petroleum (2 x 40 cm3). Cooling a dichloromethane / petroleum solution to -30 °C overnight precipitated a dark red microcrystalline solid (2.55 g, 4.0 mmol, 80%) 1H NMR (300 MHz, 293 K, CDCl3): δ 8.49 (s, 1H, CH=N), 7.84 (d, 1H, J = 6.7Hz, Ar-H), 7.50 (dd, 1H, J = 6.2, 1.5 Hz, Ar-H), 7.30-6.97 (m, 3H, Ar-H), 2.34 (s, 3H, *p*-CH3), 2.17 (s, 6H, *o*-CH3), 1.62 (s, 9H, C(CH3)3). 13C NMR (75.5 MHz, 293 K, CDCl3): δ 171.9 (C-O), 163.6 (C=N), 139.9, 138.9, 136.4, 133.6, 132.7, 132.7, 130.9, 129.5, 124.7 (Ar), 35.6 (*C*(CH3)3), 30.3 (C(*C*H3)3), 21.3 (*p*-CH3), 19.8 (*o*-CH3). Anal. Found: C, 37.69; H, 4.01; N, 1.98; Cl, 38.50. Calc. for C20H24NOCl7Ti2: C, 37.63; H, 3.79; N, 2.19; Cl, 38.87.

Ti{3-But-2-(O)C6H3CH=N(2,4,6-Me3C6H2)}Cl3 (**4c**)

Repeated recrystallisation of **3c** from a dichloromethane / light petroleum mixture afforded very small dark red plate-shaped crystals of the title compound (suitable for X-ray diffraction).

Ti{3-But-2-(O)C6H3CH=N(2,6-Pri2C6H3)}Cl3(THF) (**5b**)

**2b** (1.99 g, 5 mmol) was treated with TiCl4(THF)2 (1.67 g, 5 mmol) following a similar procedure to that for **5a**. The product was isolated in a similar fashion to **5a** giving a dark red microcrystalline solid (2.50 g, 4.45 mmol, 89%). 1H NMR (300 MHz, 293 K, CDCl3): δ 8.37 (s, 1H, CH=N), 7.71-7.08 (m, 6H, Ar-H), 4.35 (m, 4H, THF), 2.39 (m, 2H, C*H*(CH3)3), 2.03 (m, 4H, THF), 1.58 (s, 9H, But), 1.34 (d, 6H, J = 4.1 Hz, CH(C*H*3)3), 1.06 (d, 6H, J = 4.1 Hz, CH(C*H*3)3). 13C NMR (75.5 MHz, 293 K, CDCl3): δ 169.9 (C-O), 142.0 (C=N), 138.4, 135.1, 133.9, 128.2, 124.4, 124.3 (Ar), 76.8 (THF), 35.7 (*C*(CH3)3), 30.3 (C(*C*H3)3), 26.4 (CH(*C*H3)3), 25.8 (THF), 23.4 (CH(*C*H3)3). Anal. Found: C, 57.03; H, 6.79; N, 2.26; Cl, 19.17. Calc. for C27H38NO2Cl3Ti: C, 57.62; H, 6.81; N, 2.49; Cl, 18.90.

Ti{3-But-2-(O)C6H3CH=N(2,4,6-Me3C6H3)}Cl3(THF) (**5c**)

**2c** (2.60 g, 5 mmol) was treated with TiCl4(THF)2 (1.67 g, 5 mmol) following a similar procedure to that for **5a**. The product was isolated in a similar fashion to **5a** giving dark red needle-shaped crystals (suitable for X-ray diffraction) (2.21 g, 4.25 mmol, 85%). 1H NMR (300 MHz, 293 K, CDCl3): δ 8.27 (s, 1H, CH=N), 7.73-7.16 (m, 5H, Ar-H), 4.25 (m, 4H, THF), 2.31 (s, 3H, *p*-CH3), 2.28 (s, 6H, *o*-CH3), 1.93 (m, 4H, THF), 1.59 (s, 9H, C(CH3)3). 13C NMR (75.5 MHz, 293 K, CDCl3): δ 170.4 (C-O), 138.3, 137.0, 134.9, 133.7, 131.3, 129.6, 124.4 (Ar), 35.7 (*C*(CH3)3), 30.3 (C(*C*H3)3), 25.7 (THF), 21.2 (*p*-CH3), 19.8 (*o*-CH3). Anal. Found: C, 54.54; H, 6.11; N, 2.58; Cl, 20.06. Calc. for C24H32NO2Cl3Ti: C, 55.35; H, 6.19; N, 2.69; Cl, 20.42.

Ti{3-But-2-(O)C6H3CH=N(2-C6H5C6H4)}Cl3(THF) (**5d**)

**2d** (2.4 g, 5.7 mmol) was treated with TiCl4(THF)2 (1.90 g, 5.7 mmol) following a similar procedure to that for **5a**. The product was isolated in a similar fashion to **5a** giving dark red blocks (2.22 g, 4.0 mmol, 70%). 1H NMR (300 MHz, 293 K, CDCl3): δ 8.27 (s, 1H, CH=N), 7.61-7.03 (m, 12H, Ar-H), 4.17 (m, 4H, THF), 1.85 (m, 4H, THF), 1.53 (s, 9H, C(CH3)3). 13C NMR (75.5 MHz, 293 K, CDCl3): δ 170.3 (C-O), 161.9 (C=N), 139.0, 138.4, 135.7, 134.6, 133.6, 132.3, 130.5, 128.8, 127.8, 127.6, 126.8, 126.6, 124.4 (Ar), 75.7 (THF), 35.6 (*C*(CH3)3), 30.1 (C(*C*H3)3), 25.8 (THF). Anal. Found: C, 57.53; H, 5.46; N, 2.30; Cl, 19.83. Calc. For C27H­30NO2Cl3Ti: C, 58.45; H, 5.45; N, 2.52; Cl, 19.17.

Ti{3-But-2-(O)C6H3CH=N(C6F5)}Cl3(THF) (**5e**)

**2e** (1.6 g, 5 mmol) was treated with TiCl4(THF)2 (1.67 g, 5 mmol) following a similar procedure to that for **5a**. The product was isolated in a similar fashion to **5a** giving dark red blocks (suitable for X-ray diffraction) (3.05 g, 5.36 mmol, 85%). 1H NMR (300 MHz, 293 K, CDCl3): δ 8.51 (s, 1H, CH=N), 7.79 (dd, 1H, J = 7.5, 1.4 Hz, Ar-H), 7.48 (dd, 1H, J = 7.6, 1.4 Hz, Ar-H), 7.20 (t, 1H, J = 7.8 Hz, Ar-H), 4.22 (m, 4H, THF), 2.00 (m, 4H, THF), 1.58 (s, 9H, C(CH3)3).  13C NMR (75.5 MHz, 293 K, CDCl3): δ 173.8 (C-O), 162.4 (C=N), 139.1, 136.8, 135.1, 125.2, 124.2 (Ar), 75.5 (THF), 35.6 (*C*(CH3)3), 30.0 (C(*C*H3)3), 25.8 (THF). 19F (282.4 MHz, 293 K, CDCl3): δ –148.5 (br, 2F, *o-*F), -146.5 (t, 1F, *p*-F), -162.2 (br, 2F, *m*-F). Anal. Found: C, 43.90; H, 3.70; N, 2.35; Cl, 19.56. Calc. For C21H21NO2Cl3F5Ti: C, 44.36; H, 3.72; N, 2.46; Cl, 18.70.

Zr{3-But-2-(O)C6H3CH=N(2,4,6-Me3C6H2)}Cl3(THF) (**6c**)

**2c** (1.32 g, 4.5 mmol) was treated with ZrCl4(THF)2 (1.63 g, 4.5 mmol) following a similar procedure to that for **5a**. The product was isolated in a similar fashion to **5a** giving a yellow microcrystalline solid (2.36 g, 4.11 mmol, 93%). 1H NMR (300 MHz, 293 K, CDCl3): δ 8.31 (s, 1H, CH=N), 7.68 (dd, 1H, J = 7.8, 1.6 Hz, Ar-H), 7.30 (dd, 1H, J = 7.7, 1.6 Hz, Ar-H), 7.05 (t, 1H, J = 7.7 Hz, Ar-H), 6.93 (s, 2H, Ar-H), 4.31 (m, 4H, THF), 2.28 (s, 6H, *o*-CH3), 2.24 (s, 3H, *p*-CH3), 1.98 (m, 4H, THF), 1.55 (s, 9H, C(CH3)3). 13C NMR (75.5 MHz, 293 K, CDCl3): δ 173.2 (C-O), 168.7 (C=N), 140.2, 138.9, 133.6, 133.2, 130.2, 122.1, 119.9 (Ar), 76.6 (THF), 35.9 (*C*(CH3)3), 31.3 (C(*C*H3)3), 26.0 (THF), 21.6 (*p*-CH3), 18.6 (*o*-CH3). Anal. Found: C, 51.26; H, 6.02; N, 2.18; Cl, 17.41. Calc. For C24H32NO2Cl3Zr: C, 51.10; H, 5.72; N, 2.48; Cl, 18.85.

Zr{3-But-2-(O)C6H3CH=N(2-C6H5C6H4)}Cl3(THF) (**6d**)

**2d** (2.4 g, 5.7 mmol) was treated with ZrCl4(THF)2 (2.1 g, 5.7 mmol) following a similar procedure to that for **5a**. The product was isolated in a similar fashion to **5a** giving yellow block crystals suitable for X-ray crystallography (3.00 g, 5.02 mmol, 88%). 1H NMR (300 MHz, 293 K, CDCl3): δ 8.45 (s, 1H, CH=N), 7.67-6.91 (m, 12H, Ar-H), 4.79 (m, 4H, THF), 2.13 (m, 4H, THF), 1.61 (s, 12H, C(CH3)3). 13C NMR (75.5 MHz, 293 K, CDCl3): δ 173.9 (C=N), 139.8, 135.4, 134.5, 132.8, 130.8, 130.4, 130.0, 128.3, 128.2, 127.7, 127.5, 126.1, 122.0 (Ar), 75.7 (THF), 35.4 5 (*C*(CH3)3), 29.8 (C(*C*H3)3), 26.1 (THF). Anal. Found: C, 54.00; H, 2.04; N, 2.04; Cl, 18.10. Calc. For C27H30NO2Cl3Zr: C, 54.22; H, 5.06; N, 2.34; Cl, 17.78.

Zr{3-But-2-(O)C6H3CH=N(C6F5)}Cl3(THF) (**6e**)

**2e** (2.08 g, 5 mmol) was treated with ZrCl4(THF)2 (1.81 g, 5 mmol) following a similar procedure to that for **5a**. The product was isolated in a similar fashion to **5a** giving yellow needle-shaped crystals (suitable for X-ray diffraction). 1H NMR (300 MHz, 293 K, CDCl3): δ 8.51 (s, 1H, CH=N), 7.76 (dd, 1H, J = 6.4, 1.3 Hz, Ar-H), 7.43 (dd, 1H, J = 6.4, 1.3 Hz, Ar-H), 7.10 (t, 1H, J = 7.7 Hz, Ar-H), 4.23 (m, 4H, THF), 2.03 (m, 4H, THF), 1.51 (s, 9H, C(CH3)3). 13C NMR (75.5 MHz, 293 K, CDCl3): δ 177.4 (C-O), 162.7 (C=N), 160.2, 143.2, 140.5, 139.9, 137.6, 135.6, 122.9, 122.5 (Ar), 75.8 (THF), 35.5 (*C*(CH3)3), 29.8 (C(*C*H3)3), 25.8 (THF). 19F NMR (282.4 MHz, 293 K, CDCl3): δ –147.3 (br, 1F, *m*-F), -151.0 (br, 1F, *m*-F), -156.5 (t, 1F, *p*-F), -161.0 (br, 1F, *o*-F), -162.7 (br, 1F, *o*-F). Anal. Found: C, 41.32; H, 3.33; N, 2.26; Cl, 17.20. Calc. For C21H21NO2Cl3F5Zr: C, 41.22; H, 3.46; N, 2.29; Cl, 17.38.
